# Supplementary material for: High catalytic efficiency from Er3+-doped CeO2−xnanoprobes forin vivoacute oxidative damage and inflammation therapy
Source: Royal Society of Chemistry journal article supplement (doi:10.1039/d0tb01463j), 2020-01-01
Supplement: d0tb01463j1.pdf [file d0tb01463j1.pdf]

***Supporting Information for***

**High Catalytic Efficiency from Er<sup>3+</sup> doped CeO<sub>2-x</sub> Nanoprobes for in vivo Acute-Oxidative Damage and Inflammation Therapy**

*Yongmei Li<sup>\*a</sup>, Yuemei Li<sup>b</sup>, Yandong Bai<sup>c</sup>, Laixiang Lin<sup>a</sup>, Yina Sun<sup>a</sup>*

*<sup>a</sup>NHC Key Laboratory of Hormones and Development, Tianjin Key Laboratory of Metabolic Diseases, Tianjin Medical University Chu Hsien-I Memorial Hospital & Tianjin Institute of Endocrinology, Tianjin Medical University, No.6 Huanrui North Road, Ruijing Street, Beichen District, Tianjin, 300134, China.*

*<sup>b</sup>School of Chemistry and Chemical Engineering, Harbin Institute of Technology, No.92 Xidazhi Street, Nangang District, Harbin, Heilongjiang 150001, China.*

*<sup>c</sup>Tianjin Union Medical Center, NO.190 jieyuan Road, Hongqiao District, Tianjin, 300121, China.*

*\*This author is corresponding author.*

*Correspondence: Yongmei Li, E-mail: liyongmei0811@sina.com*

## Contents

**Figure S1.** The EDS image of Er/Ce<sub>2</sub>O<sub>3</sub> nanoparticles

**Figure S2.** The TEM image of Er/Ce<sub>2</sub>O<sub>3</sub> nanoparticles

**Figure S3.** The XPS result for pure Ce<sub>2</sub>O<sub>3</sub>: Er NPs without hydrogen peroxide

**Figure S4.** The x-ray diffraction of pure Er/Ce<sub>2</sub>O<sub>3</sub> NPs

**Figure S5.** The XPS of Er/Ce<sub>2</sub>O<sub>3</sub> without H<sub>2</sub>O<sub>2</sub>.

**Figure S6.** The deconvoluted XPS Ce (3d) spectrum for Er/Ce<sub>2</sub>O<sub>3</sub> NPs.

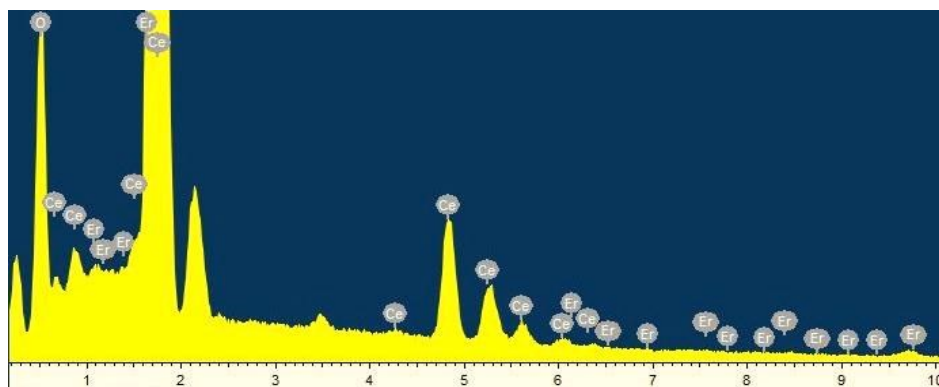

**Figure S1.** The EDS image of Er/Ce<sub>2</sub>O<sub>3</sub> nanoparticles

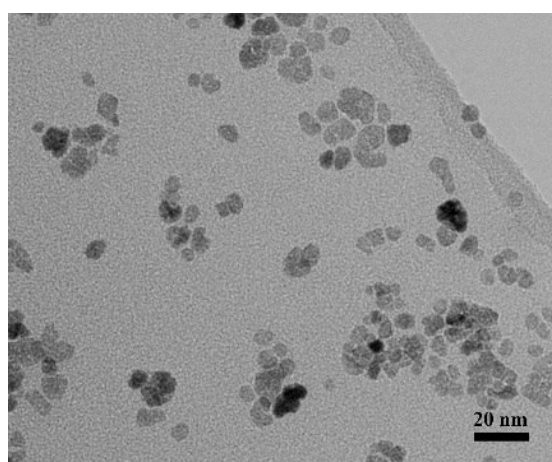

**Figure S2.** The TEM image of Er/Ce<sub>2</sub>O<sub>3</sub> nanoparticles

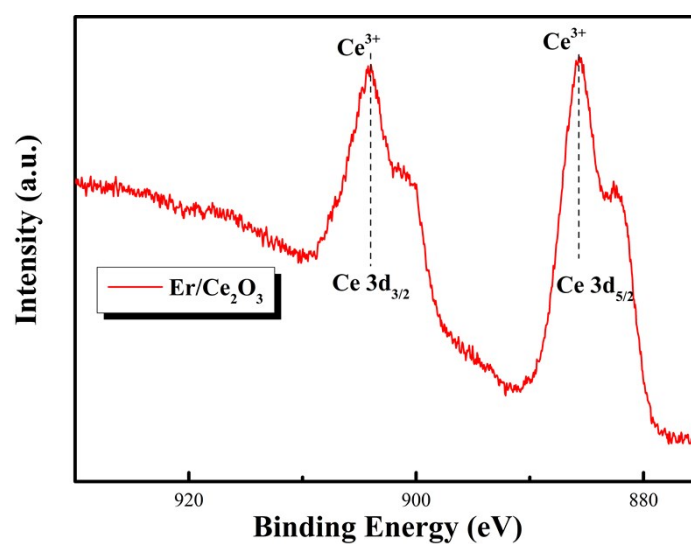

**Figure S3.** The XPS result for pure Ce<sub>2</sub>O<sub>3</sub>: Er NPs without hydrogen peroxide

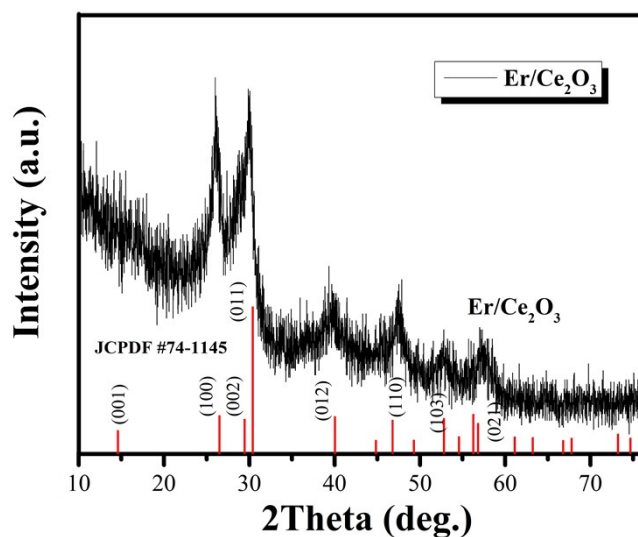

Figure S4. The x-ray diffraction of pure Er/Ce<sub>2</sub>O<sub>3</sub> NPs

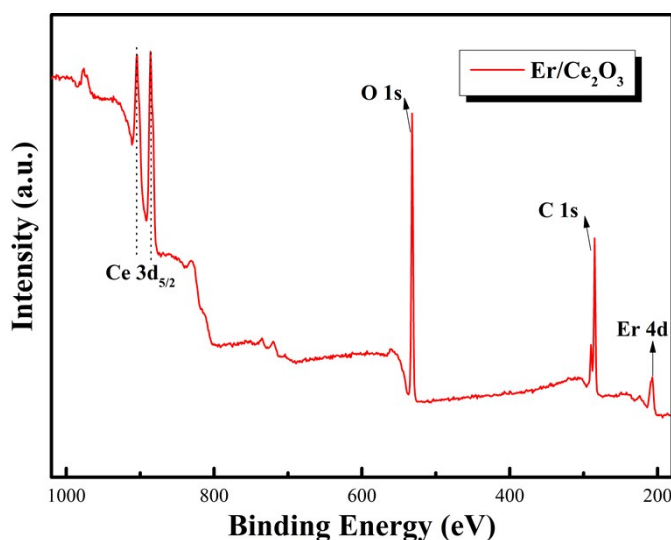

Figure S5. The XPS of Er/Ce<sub>2</sub>O<sub>3</sub> without H<sub>2</sub>O<sub>2</sub>

The deconvolute the XPS data to find the concentration Ce<sup>3+</sup> and Ce<sup>4+</sup> oxidation state was measured in Figure S6. In order to validate the changes in the nanoceria surface valence chemistry, x-ray photoelectron spectroscopic (XPS) (PE-PHI5400) study was carried out on all the particles at optimized conditions. Figure 1 showed the deconvoluted XPS Ce (3d) spectrum for Er/Ce<sub>2</sub>O<sub>3</sub> NPs. In the Figure 1,  $v_0$ ,  $v'$ ,  $u_0$ , and  $u'$  peaks were attributed to Ce<sup>3+</sup>, while  $u$  and  $u''$  were the characteristic peaks of Ce<sup>4+</sup> ions. The peak positions for all the samples were listed in Table S1.

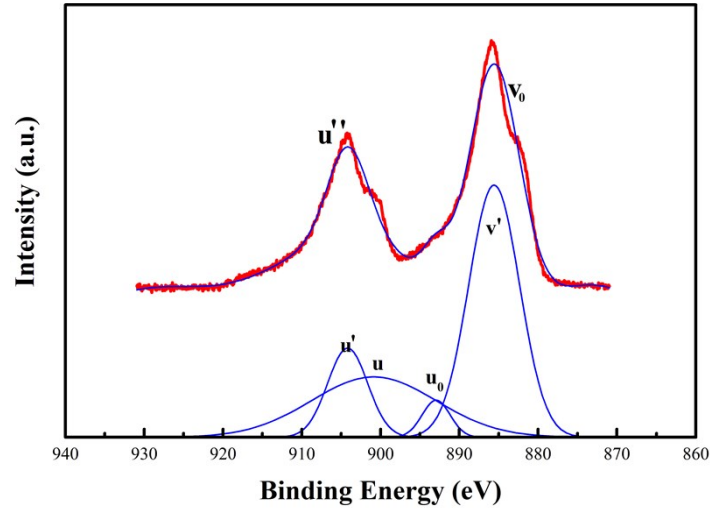

**Figure S6. The deconvoluted XPS Ce (3d) spectrum for Er/Ce<sub>2</sub>O<sub>3</sub> NPs.**

**Table S1. XPS binding energies of individual peaks of the Ce (3d) spectrum**

|                   | $v_0$  | $v'$   | $u_0$  | $u$    | $u'$   | $u''$  |
|-------------------|--------|--------|--------|--------|--------|--------|
| Ce ( $3d_{5/2}$ ) | 885.58 | 920.54 |        |        |        |        |
| Ce ( $3d_{3/2}$ ) |        |        | 892.94 | 900.85 | 904.17 | 877.56 |

A semiquantitative analysis of the integrated peak area provided the concentration of Ce<sup>3+</sup> ions in the synthesized nanoparticles. It can be calculated as equation S1. where  $A_i$  was the integrated area of peak “i.”

$$[Ce^{3+}] = \frac{A_{u_0} + A_u + A_{v_0} + A_v}{A_{u_0} + A_u + A_u' + A_{u''} + A_{v_0} + A_v} \quad (S1)$$

The Ce<sup>3+</sup> concentration in Er/Ce<sub>2</sub>O<sub>3</sub> with H<sub>2</sub>O<sub>2</sub> for 24 h was found to be 67 atom%, while that Ce<sup>4+</sup> concentration was 33 atom%.
